# Supplementary material for: Climate change influences on the geographic distributional potential of the spotted fever vectors Amblyomma maculatum and Dermacentor andersoni
Source: PeerJ. 2022 May 3;10:e13279. doi: 10.7717/peerj.13279 (PMC9074859; doi:10.7717/peerj.13279)
Supplement: Supplemental Information 1 [file peerj-10-13279-s001.xlsx]

## Sheet: Sheet1
species	lon	lat
A_maculatum	-94.3905	37.0173
A_maculatum	-94.8754	33.2049
A_maculatum	-84.9868	29.7267
A_maculatum	-80.956	34.8251
A_maculatum	-97.3898	28.6544
A_maculatum	-93.4312	32.9748
A_maculatum	-97.4424	32.4066
A_maculatum	-96.4322	36.8443
A_maculatum	-97.7671	31.15
A_maculatum	-96.5798	33.1947
A_maculatum	-94.7109	33.7226
A_maculatum	-77.525	38.8092
A_maculatum	-92.0796	30.6206
A_maculatum	-95.7171	29.1121
A_maculatum	-111.783	32.1282
A_maculatum	-88.2903	40.1319
A_maculatum	-82.1626	27.35
A_maculatum	-85.353	32.6041
A_maculatum	-79.9425	32.8005
A_maculatum	-80.5748	27.7006
A_maculatum	-89.5984	40.7179
A_maculatum	-98.7192	26.5757
A_maculatum	-96.4752	32.0481
A_maculatum	-81.51	32.26
A_maculatum	-111.18	31.42
A_maculatum	-83.44	33.02
A_maculatum	-80.51	26.1
A_maculatum	-81.42	30.58
A_maculatum	-110.1	31.37
A_maculatum	-94	38
A_maculatum	-93.6521	32.505
A_maculatum	-76.4513	35.4971
A_maculatum	-99.7333	27.95
A_maculatum	-84.4358	33.7066
A_maculatum	-79.46	33.09
A_maculatum	-82.35	29.63
A_maculatum	-91.66	29.91
A_maculatum	-97.08	36.15
A_maculatum	-88.65	30.45
A_maculatum	-81.09	31.98
A_maculatum	-97.25	25.96
A_maculatum	-97.69	30.24
A_maculatum	-95.39	29.86
A_maculatum	-84.21	31.53
A_maculatum	-75.5755	39.5429
A_maculatum	-75.2137	38.8134
A_maculatum	-89.2187	35.1128
A_maculatum	-85.9748	37.9164
A_maculatum	-87.4778	36.6679
A_maculatum	-87.2057	37.2552
A_maculatum	-78.83	35.05
A_maculatum	-81.69	27.95
A_maculatum	-83.37	33.95
A_maculatum	-90.04	29.5
A_maculatum	-87.75	30.66
A_maculatum	-89.91	40.24
A_maculatum	-81.63	33.55
A_maculatum	-97.32	35.21
A_maculatum	-89.12	32.4
A_maculatum	-81.02	29.21
A_maculatum	-98.57	34.7
A_maculatum	-84.35	30.52
A_maculatum	-97.2	37.8
A_maculatum	-97.05	33.71
A_maculatum	-104.05	30.66
A_maculatum	-77.67	37.47
A_maculatum	-86.77	33.18
A_maculatum	-95.68	33.81
A_maculatum	-110.21	31.86
A_maculatum	-96.27	29.67
A_maculatum	-76.1	38.44
A_maculatum	-76.07	39.13
A_maculatum	-81.41	26.07
A_maculatum	-89.54	34.39
A_maculatum	-88.78	33.27
A_maculatum	-90.72	31.83
A_maculatum	-81.42	31.05
A_maculatum	-81.2	27.15
A_maculatum	-76.61	37.3
A_maculatum	-76.45	36.8
A_maculatum	-75.97	37.14
A_maculatum	-75.89	36.62
A_maculatum	-84.48	30.06
A_maculatum	-86.81	35.41
A_maculatum	-98.83	28.33
A_maculatum	-88.07	36.78
A_maculatum	-91.35	34.02
A_maculatum	-78.64	35.77
A_maculatum	-87.04	30.63
A_maculatum	-89.29	31.33
A_maculatum	-77.98	34.01
A_maculatum	-85.74	30.14
A_maculatum	-98.08	27.75
D_andersoni	-117.597	49.5935
D_andersoni	-120.885	47.2533
D_andersoni	-109.549	40.5388
D_andersoni	-112.406	42.7321
D_andersoni	-115.18	47.7565
D_andersoni	-119.38	49.95
D_andersoni	-108.439	45.0951
D_andersoni	-105.398	39.8577
D_andersoni	-107.608	35.2386
D_andersoni	-104.383	38.5353
D_andersoni	-103.744	42.4857
D_andersoni	-112.007	40.3141
D_andersoni	-113.891	41.6
D_andersoni	-109.594	44.4924
D_andersoni	-111.931	47.4326
D_andersoni	-108.026	38.7798
D_andersoni	-108.728	39.158
D_andersoni	-105.949	38.2486
D_andersoni	-118.22	52.873
D_andersoni	-107.964	44.2694
D_andersoni	-113.589	53.223
D_andersoni	-114.041	48.3935
D_andersoni	-116.253	52.699
D_andersoni	-106.278	34.2714
D_andersoni	-114.478	49.627
D_andersoni	-110.076	49.991
D_andersoni	-112.477	49.072
D_andersoni	-110.614	49.379
D_andersoni	-109.811	39.2839
D_andersoni	-115.181	50.69
D_andersoni	-115.351	51.651
D_andersoni	-110.781	51.417
D_andersoni	-110.203	53.192
D_andersoni	-111.921	51.636
D_andersoni	-111.3	49.015
D_andersoni	-111.5	39
D_andersoni	-105.59	41.31
D_andersoni	-105.016	38.935
D_andersoni	-118.915	37.6464
D_andersoni	-122.529	41.5903
D_andersoni	-114.16	46.25
D_andersoni	-116.884	46.9311
D_andersoni	-122.417	45.5477
D_andersoni	-113.097	46.5211
D_andersoni	-107.501	43
D_andersoni	-107.7	49.22
D_andersoni	-107.96	50.65
D_andersoni	-106.9	51.26
D_andersoni	-106.45	51.95
D_andersoni	-120.42	50.18
D_andersoni	-120.43	50.72
D_andersoni	-117.45	46.68
D_andersoni	-119.75	43.47
D_andersoni	-118.98	45.08
D_andersoni	-114.93	46.47
D_andersoni	-112.17	44.23
D_andersoni	-105.98	46.32
D_andersoni	-106.38	41.05
D_andersoni	-120.19	39.34
D_andersoni	-113.53	43.43
D_andersoni	-110.23	44.77
D_andersoni	-112.44	41.47
D_andersoni	-110.59	44.05
D_andersoni	-112.69	50.34
D_andersoni	-113.25	56.83
D_andersoni	-114.21	51.13
D_andersoni	-111.39	41.95
D_andersoni	-113.38	51.04
D_andersoni	-111.64	50.44
D_andersoni	-113.79	52.26
D_andersoni	-111.19	40.59
D_andersoni	-109.64	45.2
D_andersoni	-109.8	35.02
D_andersoni	-120.45	39.82
D_andersoni	-121.31	44.06
D_andersoni	-107.91	39.6
D_andersoni	-107.08	38.67
D_andersoni	-119.01	44.5
D_andersoni	-108.33	52.13
D_andersoni	-107.63	51.71
D_andersoni	-105.43	50.6
D_andersoni	-109.44	56.48
